# Supplementary material
Source: PubMed Central journal article supplement (PMC4384053)
Supplement: supp_ptj.20130512_2013-0512.pdf [file supp_ptj.20130512_2013-0512.pdf]

**eAppendix.**

Search Strategies in 8 Electronic Databases (MEDLINE, CINAHL, ERIC, PASCAL, EMBASE, Scopus, CENTRAL) Using Language (English) and Date Restrictions (1985–May 2013).

| <b>Ovid MEDLINE In-Process and Other Nonindexed Citations, Ovid MEDLINE Daily and Ovid MEDLINE 1946–Present</b><br>Searches run March 16, 2010, and May 23, 2013 (update)<br>Number of citations retrieved: 1,347 (1,024 original search + 323 update) |
|--------------------------------------------------------------------------------------------------------------------------------------------------------------------------------------------------------------------------------------------------------|
| 1. exp "Physical and Rehabilitation Medicine"/                                                                                                                                                                                                         |
| 2. exp Occupational Therapy/                                                                                                                                                                                                                           |
| 3. (occupational adj therapist*).tw.                                                                                                                                                                                                                   |
| 4. ((physical or occupational) adj2 therapy adj assistant).tw.                                                                                                                                                                                         |
| 5. exp "Physical Therapy (Specialty)"/                                                                                                                                                                                                                 |
| 6. (physical adj therapist*).tw.                                                                                                                                                                                                                       |
| 7. physiotherapist*.tw.                                                                                                                                                                                                                                |
| 8. exp Speech-Language Pathology/ or exp "rehabilitation of speech and language disorders"/                                                                                                                                                            |
| 9. (speech adj2 (therapist* or pathologist*)).tw.                                                                                                                                                                                                      |
| 10. or/1–9                                                                                                                                                                                                                                             |
| 11. exp Audiovisual Aids/                                                                                                                                                                                                                              |
| 12. exp Pamphlets/                                                                                                                                                                                                                                     |
| 13. education/                                                                                                                                                                                                                                         |
| 14. exp Teaching Materials/                                                                                                                                                                                                                            |
| 15. exp Clinical Protocols/                                                                                                                                                                                                                            |
| 16. exp practice guidelines as topic/                                                                                                                                                                                                                  |
| 17. exp critical pathways/                                                                                                                                                                                                                             |
| 18. exp inservice training/                                                                                                                                                                                                                            |
| 19. exp consultants/                                                                                                                                                                                                                                   |
| 20. exp Staff Development/                                                                                                                                                                                                                             |
| 21. exp Health Knowledge, Attitudes, Practice/                                                                                                                                                                                                         |
| 22. exp Reminder Systems/                                                                                                                                                                                                                              |
| 23. exp Clinical Competence/                                                                                                                                                                                                                           |
| 24. exp Education, Continuing/                                                                                                                                                                                                                         |
| 25. professional development/                                                                                                                                                                                                                          |
| 26. exp Professional Role/                                                                                                                                                                                                                             |
| 27. exp Professional Competence/                                                                                                                                                                                                                       |
| 28. exp Guideline Adherence/                                                                                                                                                                                                                           |
| 29. (adherence adj3 guidelines).tw.                                                                                                                                                                                                                    |
| 30. exp "Attitude of Health Personnel"/                                                                                                                                                                                                                |
| 31. exp Evidence-Based Practice/                                                                                                                                                                                                                       |
| 32. exp evidence-based medicine/                                                                                                                                                                                                                       |
| 33. (workshop* or seminar* or training or in-service).tw.                                                                                                                                                                                              |
| 34. exp "Process Assessment (Health Care)"/                                                                                                                                                                                                            |
| 35. exp "Outcome and Process Assessment (Health Care)"/                                                                                                                                                                                                |
| 36. exp "Delivery of Health Care"/                                                                                                                                                                                                                     |
| 37. exp program development/mt                                                                                                                                                                                                                         |
| 38. exp Health Plan Implementation/mt, og [Methods, Organization & Administration]                                                                                                                                                                     |

(Continued)

## Translating Knowledge in Rehabilitation

### eAppendix.

Continued

|                                                                                                                                                                                                        |
|--------------------------------------------------------------------------------------------------------------------------------------------------------------------------------------------------------|
| 39. journal club*.ti,ab.                                                                                                                                                                               |
| 40. exp Quality Assurance, Health Care/                                                                                                                                                                |
| 41. organizational case studies/                                                                                                                                                                       |
| 42. (champion* adj change*).tw.                                                                                                                                                                        |
| 43. (change adj2 agent*).tw.                                                                                                                                                                           |
| 44. ((facilitat* or coordinat*) adj2 change*).tw.                                                                                                                                                      |
| 45. financial incentive*.tw.                                                                                                                                                                           |
| 46. (audit adj3 feedback).tw.                                                                                                                                                                          |
| 47. or/11–46                                                                                                                                                                                           |
| 48. exp motivation/                                                                                                                                                                                    |
| 49. exp Self Efficacy/                                                                                                                                                                                 |
| 50. exp Organizational Innovation/                                                                                                                                                                     |
| 51. exp "diffusion of innovation"/                                                                                                                                                                     |
| 52. ((research or evidence or guideline*) adj3 (implementation or utilization or utilisation or diffusion or translation)).tw.                                                                         |
| 53. (increase adj2 implementation).tw.                                                                                                                                                                 |
| 54. ((predisposing or enabling or reinforcing) adj factor*).tw.                                                                                                                                        |
| 55. ((support or impede) adj change*).tw.                                                                                                                                                              |
| 56. (behavio?r adj2 change*).tw.                                                                                                                                                                       |
| 57. (knowledge adj2 (utilization or utilisation or uptake or transfer* or implementation or dissemination or diffusion* or translation)).tw.                                                           |
| 58. (implementation adj2 (program or strategy or strategies)).tw.                                                                                                                                      |
| 59. decision making/                                                                                                                                                                                   |
| 60. or/48–59                                                                                                                                                                                           |
| 61. and/10,47,60                                                                                                                                                                                       |
| 62. limit 61 to (english language and yr="1985-Current")<br>For Search Update, this line was replaced with limit 62 to ed=20100316-20130523                                                            |
| 63. limit 62 to ("in data review" or in process)<br>This line appeared only in Search Update                                                                                                           |
| 65. 62 or 63<br>This line appeared only in Search Update                                                                                                                                               |
| <b>Ovid EBM Reviews–Cochrane Central Register of Controlled Trials</b><br>Searches run March 17, 2010, and May 23, 2013 (update)<br>Number of citations retrieved: 95 (76 original search + 19 update) |
| 1. exp "Physical and Rehabilitation Medicine"/                                                                                                                                                         |
| 2. exp Occupational Therapy/                                                                                                                                                                           |
| 3. (occupational adj therapist*).tw.                                                                                                                                                                   |
| 4. ((physical or occupational) adj2 therapy adj assistant).tw.                                                                                                                                         |
| 5. exp "Physical Therapy (Specialty)"/                                                                                                                                                                 |
| 6. (physical adj therapist*).tw.                                                                                                                                                                       |
| 7. physiotherapist*.tw.                                                                                                                                                                                |
| 8. exp Speech-Language Pathology/ or exp "rehabilitation of speech and language disorders"/                                                                                                            |
| 9. (speech adj2 (therapist* or pathologist*)).tw.                                                                                                                                                      |
| 10. or/1–9                                                                                                                                                                                             |
| 11. exp Audiovisual Aids/                                                                                                                                                                              |

(Continued)

**eAppendix.**

Continued

|                                                                                                                                |
|--------------------------------------------------------------------------------------------------------------------------------|
| 12. exp Pamphlets/                                                                                                             |
| 13. education/                                                                                                                 |
| 14. exp Teaching Materials/                                                                                                    |
| 15. exp Clinical Protocols/                                                                                                    |
| 16. exp practice guidelines as topic/                                                                                          |
| 17. exp critical pathways/                                                                                                     |
| 18. exp inservice training/                                                                                                    |
| 19. exp consultants/                                                                                                           |
| 20. exp Staff Development/                                                                                                     |
| 21. exp Health Knowledge, Attitudes, Practice/                                                                                 |
| 22. exp Reminder Systems/                                                                                                      |
| 23. exp Clinical Competence/                                                                                                   |
| 24. exp Education, Continuing/                                                                                                 |
| 25. professional development/                                                                                                  |
| 26. exp Professional Competence/                                                                                               |
| 27. exp Guideline Adherence/                                                                                                   |
| 28. (adherence adj3 guidelines).tw.                                                                                            |
| 29. (guideline adj3 adherence).tw.                                                                                             |
| 30. exp "Attitude of Health Personnel"/                                                                                        |
| 31. exp Evidence-Based Practice/                                                                                               |
| 32. exp evidence-based medicine/                                                                                               |
| 33. (workshop* or seminar* or training or in-service).tw.                                                                      |
| 34. exp "Process Assessment (Health Care)"/                                                                                    |
| 35. exp "Outcome and Process Assessment (Health Care)"/                                                                        |
| 36. exp "Delivery of Health Care"/                                                                                             |
| 37. exp program development/mt                                                                                                 |
| 38. exp Health Plan Implementation/mt, og                                                                                      |
| 39. (journal adj club).ti,ab.                                                                                                  |
| 40. exp Quality Assurance, Health Care/                                                                                        |
| 41. organizational case studies/                                                                                               |
| 42. (champion* adj2 change*).tw.                                                                                               |
| 43. (change adj2 agent*).tw.                                                                                                   |
| 44. ((facilitat* or coordinat*) adj2 change*).tw.                                                                              |
| 45. professional development/                                                                                                  |
| 46. financial incentive*.tw.                                                                                                   |
| 47. (audit adj3 feedback).tw.                                                                                                  |
| 48. or/11-47                                                                                                                   |
| 49. exp motivation/                                                                                                            |
| 50. exp Self Efficacy/                                                                                                         |
| 51. exp Organizational Innovation/                                                                                             |
| 52. exp "diffusion of innovation"/                                                                                             |
| 53. ((research or evidence or guideline*) adj3 (implementation or utilization or utilisation or diffusion or translation)).tw. |

(Continued)

## Translating Knowledge in Rehabilitation

### eAppendix.

Continued

|                                                                                                                                                                 |
|-----------------------------------------------------------------------------------------------------------------------------------------------------------------|
| 54. ((predisposing or enabling or reinforcing) adj2 factor*).tw.                                                                                                |
| 55. ((support or impede) adj2 change*).tw.                                                                                                                      |
| 56. (behavior adj2 change*).tw.                                                                                                                                 |
| 57. (knowledge adj2 (utilization or utilisation or uptake or transfer* or implementation or dissemination or diffusion* or translation)).tw.                    |
| 58. (increase adj2 implementation).tw.                                                                                                                          |
| 59. (implementation adj2 (program or strategy or strategies)).tw.                                                                                               |
| 60. decision making/                                                                                                                                            |
| 61. or/49-60                                                                                                                                                    |
| 62. and/10,48,61                                                                                                                                                |
| 63. limit 62 to (english language and yr="1985-Current")<br>For Search Update, this line was replaced with limit 62 to (english language and yr="2010-Current") |
| <b>Ovid EMBASE</b><br>Searches run March 17, 2010, and May 23, 2013 (update)<br>Number of citations retrieved: 329 (267 original search + 62 update)            |
| 1. (rehab* adj (medicine or care or therap*)).tw.                                                                                                               |
| 2. occupational therap*.tw.                                                                                                                                     |
| 3. physiotherap*.tw.                                                                                                                                            |
| 4. physical therap*.tw.                                                                                                                                         |
| 5. (speech language adj (patholog* or therap*)).tw.                                                                                                             |
| 6. speech therap*.tw.                                                                                                                                           |
| 7. or/2-6                                                                                                                                                       |
| 8. audiovisual aids.tw.                                                                                                                                         |
| 9. (pamphlets or brochures or handouts).tw.                                                                                                                     |
| 10. consultant*.tw.                                                                                                                                             |
| 11. staff development.tw.                                                                                                                                       |
| 12. ((professional or clinical) adj competence).tw.                                                                                                             |
| 13. evidence-based*.tw.                                                                                                                                         |
| 14. (guideline adj2 adherence*).tw.                                                                                                                             |
| 15. (adherence adj2 guideline*).tw.                                                                                                                             |
| 16. (workshop* or seminar* or training or in-service).tw.                                                                                                       |
| 17. (champion* adj change*).tw.                                                                                                                                 |
| 18. (change adj2 agent*).tw.                                                                                                                                    |
| 19. ((facilitat* or coordinat*) adj2 change*).tw.                                                                                                               |
| 20. financial incentive*.tw.                                                                                                                                    |
| 21. (audit adj3 feedback).tw.                                                                                                                                   |
| 22. motivation*.tw.                                                                                                                                             |
| 23. self efficacy.tw.                                                                                                                                           |
| 24. diffusion of innovation.tw.                                                                                                                                 |
| 25. ((research or evidence or guideline*) adj3 (implementation or utilization or utilisation or diffusion or translation)).tw.                                  |
| 26. ((predisposing or enabling or reinforcing) adj2 factor*).tw.                                                                                                |
| 27. ((support* or impede*) adj change*).tw.                                                                                                                     |
| 28. (behavior adj2 change*).tw.                                                                                                                                 |

(Continued)

**eAppendix.**

Continued

|                                                                                                                                                            |
|------------------------------------------------------------------------------------------------------------------------------------------------------------|
| 29. (knowledge adj2 (utilization or utilisation or uptake or transfer* or implementation or dissemination or diffusion* or translation)).tw.               |
| 30. (increase* adj2 implementation).tw.                                                                                                                    |
| 31. (implementation adj2 (program* or strategy or strategies)).tw.                                                                                         |
| 32. decision making.tw.                                                                                                                                    |
| 33. or/22-32                                                                                                                                               |
| 34. 7 and 33                                                                                                                                               |
| 35. or/8-21                                                                                                                                                |
| 36. 7 and 35                                                                                                                                               |
| 37. 34 or 36                                                                                                                                               |
| 38. limit 37 to yr="1985-Current"<br>For Search Update, this line was replaced with limit 37 to em=201003-201305                                           |
| 39. limit 38 to english language                                                                                                                           |
| <b>Ovid PASCAL 1984-</b><br>Searches run March 16, 2010, and May 23, 2013 (update)<br>Number of citations retrieved: 202 (181 original search + 21 update) |
| 1. (rehab* adj (medicine or care or therap*)).tw.                                                                                                          |
| 2. occupational therap*.tw.                                                                                                                                |
| 3. physiotherap*.tw.                                                                                                                                       |
| 4. physical therap*.tw.                                                                                                                                    |
| 5. (speech language adj (patholog* or therap*)).tw.                                                                                                        |
| 6. speech therap*.tw.                                                                                                                                      |
| 7. or/2-6                                                                                                                                                  |
| 8. audiovisual aids.tw.                                                                                                                                    |
| 9. (pamphlets or brochures or handouts).tw.                                                                                                                |
| 10. consultant*.tw.                                                                                                                                        |
| 11. staff development.tw.                                                                                                                                  |
| 12. ((professional or clinical) adj competence).tw.                                                                                                        |
| 13. evidence-based*.tw.                                                                                                                                    |
| 14. (guideline adj2 adherence*).tw.                                                                                                                        |
| 15. (adherence adj2 guideline*).tw.                                                                                                                        |
| 16. (workshop* or seminar* or training or in-service).tw.                                                                                                  |
| 17. (champion* adj change*).tw.                                                                                                                            |
| 18. (change adj2 agent*).tw.                                                                                                                               |
| 19. ((facilitat* or coordinat*) adj2 change*).tw.                                                                                                          |
| 20. financial incentive*.tw.                                                                                                                               |
| 21. (audit adj3 feedback).tw.                                                                                                                              |
| 22. motivation*.tw.                                                                                                                                        |
| 23. self efficacy.tw.                                                                                                                                      |
| 24. diffusion of innovation.tw.                                                                                                                            |
| 25. ((research or evidence or guideline*) adj3 (implementation or utilization or utilisation or diffusion or translation)).tw.                             |
| 26. ((predisposing or enabling or reinforcing) adj2 factor*).tw.                                                                                           |
| 27. ((support* or impede*) adj change*).tw.                                                                                                                |
| 28. (behavi?or adj2 change*).tw.                                                                                                                           |

(Continued)

## Translating Knowledge in Rehabilitation

### eAppendix.

Continued

|                                                                                                                                                   |
|---------------------------------------------------------------------------------------------------------------------------------------------------|
| 29. (knowledge adj2 (utilization or utilisation or uptake or transfer* or implementation or dissemination or diffusion* or translation)).tw.      |
| 30. (increase* adj2 implementation).tw.                                                                                                           |
| 31. (implementation adj2 (program* or strategy or strategies)).tw.                                                                                |
| 32. decision making.tw.                                                                                                                           |
| 33. or/22-32                                                                                                                                      |
| 34. 7 and 33                                                                                                                                      |
| 35. or/8-21                                                                                                                                       |
| 36. 7 and 35                                                                                                                                      |
| 37. 34 or 36                                                                                                                                      |
| 38. limit 37 to yr="1985-Current"<br>For Search Update, this line was replaced with limit 37 to yr="2010-Current"                                 |
| <b>Ovid ERIC</b><br>Searches run March 16, 2010, and May 23, 2013 (update)<br>Number of citations retrieved: 103 (81 original search + 22 update) |
| 1. exp Occupational Therapy/                                                                                                                      |
| 2. (occupational adj therapist*).tw.                                                                                                              |
| 3. ((physical or occupational) adj2 therapy assistant).tw.                                                                                        |
| 4. exp Physical Therapy/                                                                                                                          |
| 5. exp Speech Language Pathology/                                                                                                                 |
| 6. (rehab* adj (medicine or care or therap*)).tw.                                                                                                 |
| 7. (physical adj therapist*).tw.                                                                                                                  |
| 8. physiotherapist*.tw.                                                                                                                           |
| 9. or/1-6                                                                                                                                         |
| 10. exp Audiovisual Aids/                                                                                                                         |
| 11. exp Pamphlets/                                                                                                                                |
| 12. exp Instructional Materials/                                                                                                                  |
| 13. exp Standards/ or exp Guidelines/                                                                                                             |
| 14. exp Inservice Education/                                                                                                                      |
| 15. exp Consultants/                                                                                                                              |
| 16. exp Staff Development/                                                                                                                        |
| 17. exp Continuing Education/                                                                                                                     |
| 18. exp Professional Development/                                                                                                                 |
| 19. (workshop* or seminar* or training or in-service).tw.                                                                                         |
| 20. exp Program Development/                                                                                                                      |
| 21. journal club.ti,ab.                                                                                                                           |
| 22. (champion* adj change*).tw.                                                                                                                   |
| 23. ((facilitat* or coordinat*) adj2 change*).tw.                                                                                                 |
| 24. financial incentive*.tw.                                                                                                                      |
| 25. (audit adj3 feedback).tw.                                                                                                                     |
| 26. or/10-25                                                                                                                                      |
| 27. exp Motivation/                                                                                                                               |
| 28. exp Attitude Change/                                                                                                                          |
| 29. exp Self Efficacy/                                                                                                                            |

(Continued)

eAppendix.

Continued

|                                                                                                                                                                                                                                                                                            |
|--------------------------------------------------------------------------------------------------------------------------------------------------------------------------------------------------------------------------------------------------------------------------------------------|
| 30. exp "Adoption (Ideas)"/                                                                                                                                                                                                                                                                |
| 31. exp Information Dissemination/                                                                                                                                                                                                                                                         |
| 32. ((research or evidence or guideline*) adj3 (implementation or utilization or utilisation or diffusion or translation)).tw.                                                                                                                                                             |
| 33. ((predisposing or enabling or reinforcing) adj2 factor*).tw.                                                                                                                                                                                                                           |
| 34. ((support* or impede*) adj change*).tw.                                                                                                                                                                                                                                                |
| 35. (behavi?or adj2 change*).tw.                                                                                                                                                                                                                                                           |
| 36. (knowledge adj2 (utilization or utilisation or uptake or transfer* or implementation or dissemination or diffusion* or translation)).tw.                                                                                                                                               |
| 37. (increase* adj2 implementation).tw.                                                                                                                                                                                                                                                    |
| 38. (implementation adj2 (program* or strategy or strategies)).tw.                                                                                                                                                                                                                         |
| 39. exp Decision Making/                                                                                                                                                                                                                                                                   |
| 40. exp "Transfer of Training"/                                                                                                                                                                                                                                                            |
| 41. or/27-40                                                                                                                                                                                                                                                                               |
| 42. and/9,26,41                                                                                                                                                                                                                                                                            |
| 43. limit 42 to english language                                                                                                                                                                                                                                                           |
| 44. limit 43 to yr="1985-Current"<br>For Search Update, this line was replaced with limit 42 to em=201003-201305                                                                                                                                                                           |
| <b>EBSCOhost CINAHL</b><br>Searches run March 17, 2010, and May 23, 2013 (update)<br>Number of citations retrieved: 1,673 (1,281 original search + 392 update)                                                                                                                             |
| S48 S46 AND S47<br>This line appeared only in Search Update                                                                                                                                                                                                                                |
| S46 EM 20100317-20130523<br>This line appeared only in Search Update                                                                                                                                                                                                                       |
| S45 S10 AND S26 AND S44 <b>Limiters</b> -Published Date: 19850101-20101231; Research Article<br>For Search Update, this line was the following:<br>S10 AND S26 AND S44 <b>Limiters</b> -Research Article                                                                                   |
| S44 S27 OR S28 OR S29 OR S30 OR S31 OR S32 OR S33 OR S34 OR S35 OR S36 OR S37<br>OR S38 OR S39 OR S40 OR S41 OR S42 OR S43                                                                                                                                                                 |
| S43 (MH "Decision Making+") or (MH "Decision Making, Clinical") or (MH "Decision Making, Organizational")                                                                                                                                                                                  |
| S42 (MH "Program Implementation") or (MH "Systems Implementation")                                                                                                                                                                                                                         |
| S41 TI ("implementation program*" or "implementation strategy" or "implementation strategies" or "Implementation plan") OR AB ("implementation program*" or "implementation strategy" or "implementation strategies" or "implementation plan")                                             |
| S40 TI "increase implementation" OR AB "increase implementation"                                                                                                                                                                                                                           |
| S39 (MH "Behavioral Changes") or (MH "Transtheoretical Stages of Change Model")                                                                                                                                                                                                            |
| S38 TI ("behaviour change" or "behavior change") OR AB ("behaviour change" or "behavior change")                                                                                                                                                                                           |
| S37 TI ("predisposing factor*" or "enabling factor*" or "reinforcing factor*") OR AB ("predisposing factor*" or "enabling factor*" or "reinforcing factor*")                                                                                                                               |
| S36 TI ("knowledge implementation" or "knowledge utilization" or "knowledge diffusion" or "knowledge translation" or "knowledge utilisation") OR AB ("knowledge implementation" or "knowledge utilization" or "knowledge diffusion" or "knowledge translation" or "knowledge utilisation") |
| S35 TI ("guideline implementation" or "guideline utilization" or "guideline diffusion" or "guideline translation" or "guideline utilisation") OR AB ("guideline implementation" or "guideline utilization" or "guideline diffusion" or "guideline translation" or "guideline utilisation") |

(Continued)

## Translating Knowledge in Rehabilitation

### eAppendix.

Continued

|     |                                                                                                                                                                                                                                                                              |
|-----|------------------------------------------------------------------------------------------------------------------------------------------------------------------------------------------------------------------------------------------------------------------------------|
| S34 | TI (“evidence implementation” or “evidence utilization” or “evidence diffusion” or “evidence translation” or “evidence utilisation”) OR AB (“evidence implementation” or “evidence utilization” or “evidence diffusion” or “evidence translation” or “evidence utilisation”) |
| S33 | TI (“research implementation” or “research utilization” or “research diffusion” or “research translation” or “research utilisation”) OR AB (“research implementation” or “research utilization” or “research diffusion” or “research translation” or “research utilisation”) |
| S32 | (MH “Program Implementation”)                                                                                                                                                                                                                                                |
| S31 | (MH “Self-Efficacy”)                                                                                                                                                                                                                                                         |
| S30 | (MH “Diffusion of Innovation”)                                                                                                                                                                                                                                               |
| S29 | (MH “Decision Making, Organizational”) or (MH “Organizational Change”) or (MH “Organizational Compliance”) or (MH “Organizational Culture”)                                                                                                                                  |
| S28 | (MH “Attitude to Change”)                                                                                                                                                                                                                                                    |
| S27 | (MH “Motivation”)                                                                                                                                                                                                                                                            |
| S26 | S11 OR S12 OR S13 OR S14 OR S15 OR S16 OR S17 OR S18 OR S19 OR S20 OR S21 OR S22 OR S23 OR S24 OR S25                                                                                                                                                                        |
| S25 | TI (“champion* of change” OR “change agent*” OR “facilitator* of change” OR “coordinator* of change”) OR AB (“champion* of change” OR “change agent*” OR “facilitator* of change” OR “coordinator* of change”)                                                               |
| S24 | TI “journal club” or AB “journal club”                                                                                                                                                                                                                                       |
| S23 | TI (workshop* OR seminar* OR training OR in-service) OR AB (workshop* OR seminar* OR training OR in-service)                                                                                                                                                                 |
| S22 | (MH “Occupational Therapy Practice, Evidence-Based”) or (MH “Physical Therapy Practice, Evidence-Based”) or (MH “Professional Practice, Evidence-Based+”)                                                                                                                    |
| S21 | TI “adherence to guidelines” OR AB “adherence to guidelines”                                                                                                                                                                                                                 |
| S20 | (MH “Guideline Adherence”)                                                                                                                                                                                                                                                   |
| S19 | (MH “Professional Competence”)                                                                                                                                                                                                                                               |
| S18 | (MH “Professional Role”)                                                                                                                                                                                                                                                     |
| S17 | (MH “Staff Development+”)                                                                                                                                                                                                                                                    |
| S16 | (MH “Continuing Education Providers”) or (MH “Education, Continuing+”)                                                                                                                                                                                                       |
| S15 | (MH “Clinical Competence+”)                                                                                                                                                                                                                                                  |
| S14 | (MH “Reminder Systems”)                                                                                                                                                                                                                                                      |
| S13 | (MH “Practice Guidelines”)                                                                                                                                                                                                                                                   |
| S12 | (MH “Pamphlets”)                                                                                                                                                                                                                                                             |
| S11 | (MH “Audiovisuals”)                                                                                                                                                                                                                                                          |
| S10 | S1 or S2 or S3 or S4 or S5 or S6 or S7 or S8 or S9                                                                                                                                                                                                                           |
| S9  | (MH “Speech-Language Pathologists”)                                                                                                                                                                                                                                          |
| S8  | (MH “Speech-Language Pathology Assistants”)                                                                                                                                                                                                                                  |
| S7  | (MH “Speech-Language Pathology”)                                                                                                                                                                                                                                             |
| S6  | (MH “Occupational Therapists”)                                                                                                                                                                                                                                               |
| S5  | (MH “Physical Therapists”)                                                                                                                                                                                                                                                   |
| S4  | (MH “Occupational Therapy Assistants”)                                                                                                                                                                                                                                       |
| S3  | (MH “Physical Therapist Assistants”)                                                                                                                                                                                                                                         |
| S2  | (MH “Physical Therapy+”)                                                                                                                                                                                                                                                     |
| S1  | (MH “Occupational Therapy+”)                                                                                                                                                                                                                                                 |

(Continued)



eAppendix.

Continued

**Scopus**

Searches run March 18, 2010, and May 22, 2013 (update)  
 Number of citations retrieved: 1,046 (818 original search + 228 update)

((TITLE-ABS-KEY(occupational PRE/0 therapist\*) OR TITLE-ABS-KEY(physical PRE/0 therapist\*) OR TITLE-ABS-KEY(physiotherapist\*) OR TITLE-ABS-KEY(speech W/2 pathologist\*) OR TITLE-ABS-KEY(speech W/2therapist\*) OR TITLE-ABS-KEY(dietitian\* OR dietician\*) OR TITLE-ABS-KEY(diet\* W/2 technician\*) OR TITLE-ABS-KEY(diet W/2 technologist\*) OR TITLE-ABS-KEY(pharmacist\*) OR TITLE-ABS-KEY(pharm\* W/2technologist\*) OR TITLE-ABS-KEY(pharm\* W/2 technician\*)) AND PUBYEAR > 1984 AND PUBYEAR < 2011)AND (((TITLE-ABS-KEY(audiovisual) OR TITLE-ABS-KEY(pamphlet\*) OR TITLE-ABS-KEY(practice PRE/0guidelines) OR TITLE-ABS-KEY(in-service) OR TITLE-ABS-KEY(consultant\*) OR TITLE-ABS-KEY(reminder\*)OR TITLE-ABS-KEY(continuing PRE/0 education) OR TITLE-ABS-KEY(professional PRE/0 competence) OR TITLE-ABS-KEY(professional PRE/0 role) OR TITLE-ABS-KEY(guideline W/3 adherence) OR TITLE-ABS-KEY(evidence-based)) AND PUBYEAR > 1984 AND PUBYEAR < 2011) OR ((TITLE-ABS-KEY(workshop\*) OR TITLE-ABS-KEY(seminar\*) OR TITLE-ABS-KEY(training) OR TITLE-ABS-KEY(journal PRE/1 club) OR TITLE-ABS-KEY(champion W/2 change\*) OR TITLE-ABS-KEY(facilitat\* W/2 change) OR TITLE-ABS-KEY(coordinat\* W/2change)) AND PUBYEAR > 1984 AND PUBYEAR < 2011)) AND (((TITLE-ABS-KEY(self PRE/0 efficacy) OR TITLE-ABS-KEY(organizational W/2 innovation) OR TITLE-ABS-KEY(diffusion W/2 innovation) OR TITLE-ABS-KEY(research W/3 implementation) OR TITLE-ABS-KEY(research W/3 utilization) OR TITLE-ABS-KEY(research W/3 diffusion) OR TITLE-ABS-KEY(research W/3 translation) OR TITLE-ABS-KEY(evidence W/3implementation) OR TITLE-ABS-KEY(evidence W/3 utilization) OR TITLE-ABS-KEY(evidence W/3 diffusion) OR TITLE-ABS-KEY(evidence W/3 translation)) AND PUBYEAR > 1984 AND PUBYEAR < 2011) OR ((TITLE-ABS-KEY(guideline\* W/3 implementation) OR TITLE-ABS-KEY(guideline\* utilization) OR TITLE-ABS-KEY(guideline\* W/3 diffusion) OR TITLE-ABS-KEY(guideline W/3 translation) OR TITLE-ABS-KEY(support W/2change\*) OR TITLE-ABS-KEY(impede W/3 change\*) OR TITLE-ABS-KEY(knowledge W/2 utilization) OR TITLE-ABS-KEY(knowledge W/2 uptake) OR TITLE-ABS-KEY(knowledge W/2 transfer\*) OR TITLE-ABS-KEY(knowledge W/2 implementation) OR TITLE-ABS-KEY(knowledge W/2 dissemination)) AND PUBYEAR >1984 ) OR ((TITLE-ABS-KEY(knowledge W/2 diffusion) OR TITLE-ABS-KEY(knowledgeW/2 translation) OR TITLE-ABS-KEY(implementation W/2 program\*) OR TITLE-ABS-KEY(implementation W/2strateg\*) OR TITLE-ABS-KEY(increase W/2 implementation)) AND PUBYEAR > 1984 ))AND (LIMIT-TO(LANGUAGE, "English"))
